# Supplementary material
Source: HighWire-hosted journal article supplement (http://www.qdcxjkg.com/highwire/filestream/113814/field_highwire_adjunct_files/0/On_line_depository_Agusti_et_al_ECLIPSE_GOLD_2011_ERJ_REVISED_VERSION_Feb_6_2013_CLEAN.pdf)
Supplement: On_line_depository_Agusti_et_al_ECLIPSE_GOLD_2011_ERJ_REVISED_VERSION_Feb_6_2013_CLEAN.pdf [file On_line_depository_Agusti_et_al_ECLIPSE_GOLD_2011_ERJ_REVISED_VERSION_Feb_6_2013_CLEAN.pdf]

**CHARACTERISTICS, STABILITY AND OUTCOMES OF THE GOLD 2011  
COPD GROUPS IN THE ECLIPSE COHORT**

Alvar Agusti\*<sup>1</sup>, Lisa D. Edwards<sup>2</sup>, Bartolomé Celli<sup>3</sup>, William MacNee<sup>4</sup>, Peter M. A. Calverley<sup>5</sup>, Hana Mullerova<sup>6</sup>, David A. Lomas<sup>7</sup>, Emiel Wouters<sup>8</sup>, Per Bakke<sup>9</sup>, Steve Rennard<sup>10</sup>, Courtney Crim<sup>2</sup>, Bruce E. Miller<sup>11</sup>, Harvey O. Coxson<sup>12</sup>, Julie C. Yates<sup>2</sup>, Ruth Tal-Singer<sup>11</sup>, Jørgen Vestbo<sup>13</sup> for the Evaluation of COPD Longitudinally to Identify Predictive Surrogate Endpoints (ECLIPSE) investigators (see Appendix)

**Table 1E:** Distribution and outcomes during follow-up of the four GOLD 2011 groups by gender.

|                                          | MALES     |           |           |           |                       | FEMALES   |           |           |           |                         |
|------------------------------------------|-----------|-----------|-----------|-----------|-----------------------|-----------|-----------|-----------|-----------|-------------------------|
| Distribution                             | Group A   | Group B   | Group C   | Group D   | Overall p value MALES | Group A   | Group B   | Group C   | Group D   | Overall p value FEMALES |
| N                                        | 304       | 187       | 334       | 550       |                       | 191       | 106       | 149       | 280       |                         |
| Percent                                  | 22%       | 14%       | 24%       | 40%       |                       | 26%       | 15%       | 21%       | 39%       |                         |
| <b>Outcomes during follow-up (3 yrs)</b> |           |           |           |           |                       |           |           |           |           |                         |
| Mortality rate (%)                       | 17 (6%)   | 19 (10%)  | 29 (9%)   | 78 (14%)  | <0.001                | 5 (3%)    | 9 (8%)    | 12 (8%)   | 36 (13%)  | 0.002                   |
| ECOPD (per year)                         | 0.5 (0.7) | 0.7 (1.0) | 1.2 (1.4) | 1.6 (1.7) | <0.001                | 0.6 (0.8) | 1.1 (1.0) | 1.5 (1.4) | 1.9 (1.6) | <0.001                  |
| ≥1 Hospitalization (%)                   | 30 (10%)  | 42 (23%)  | 106 (32%) | 244 (45%) | <0.001                | 26 (14%)  | 29 (28%)  | 37 (25%)  | 134 (48%) | <0.001                  |

**Table 2E.** Self-reported comorbidities, concomitant medication use and markers of systemic inflammation (median [IQR]) in the four GOLD 2011 groups.

|                                    | Group A       | Group B      | Group C      | Group D      | P value |
|------------------------------------|---------------|--------------|--------------|--------------|---------|
| <b>Self-reported comorbidities</b> |               |              |              |              |         |
| Hypertension, %                    | 213 (44%)     | 150 (53%)    | 153 (33%)    | 324 (41%)    | <0.001  |
| Angina, %                          | 40 (9%)       | 45 (17%)     | 38 (8%)      | 90 (12%)     | 0.001   |
| Heart attack, %                    | 43 (9%)       | 35 (12%)     | 22 (5%)      | 80 (10%)     | 0.001   |
| Stroke, %                          | 15 (3%)       | 19 (7%)      | 16 (3%)      | 29 (4%)      | 0.053   |
| Heart failure, %                   | 24 (5%)       | 30 (11%)     | 19 (4%)      | 68 (9%)      | <0.001  |
| Arrhythmia, %                      | 53 (11%)      | 35 (13%)     | 48 (10%)     | 103 (13%)    | 0.408   |
| Osteoporosis, %                    | 57 (12%)      | 42 (16%)     | 60 (13%)     | 118 (15%)    | 0.344   |
| Osteoarthritis, %                  | 66 (14%)      | 48 (18%)     | 54 (12%)     | 112 (14%)    | 0.144   |
| Rheumatoid arthritis, %            | 10 (2%)       | 11 (4%)      | 17 (4%)      | 22 (3%)      | 0.374   |
| Inflammatory bowel disorder, %     | 21 (4%)       | 20 (7%)      | 17 (4%)      | 42 (5%)      | 0.146   |
| Diabetes, %                        | 50 (10%)      | 44 (15%)     | 27 (6%)      | 92 (11%)     | <0.001  |
| Peptic ulcer, %                    | 45 (10%)      | 37 (14%)     | 50 (11%)     | 83 (10%)     | 0.379   |
| Reflux/heartburn, %                | 129 (27%)     | 96 (34%)     | 101 (21%)    | 215 (27%)    | 0.002   |
| Depression requiring treatment,    | 62 (13%)      | 57 (20%)     | 68 (14%)     | 154 (19%)    | 0.005   |
| Anxiety/panic attacks, %           | 57 (12%)      | 58 (20%)     | 56 (12%)     | 178 (22%)    | <0.001  |
| <b>Concomitant Medications</b>     |               |              |              |              |         |
| LABA use, %                        | 250 (51%)     | 181 (62%)    | 347 (72%)    | 649 (78%)    | <0.001  |
| LABA Only, %                       | 33 (7%)       | 20 (7%)      | 22 (5%)      | 30 (4%)      | 0.037   |
| ICS use, %                         | 256 (52%)     | 187 (64%)    | 364 (75%)    | 702 (85%)    | <0.001  |
| ICS Only, %                        | 39 (8%)       | 26 (9%)      | 39 (8%)      | 83 (10%)     | 0.516   |
| ICS+LABA, %                        | 217 (44%)     | 161 (55%)    | 325 (67%)    | 619 (75%)    | <0.001  |
| Tiotropium use, %                  | 159 (32%)     | 140 (48%)    | 219 (45%)    | 449 (54%)    | <0.001  |
| Statin use, %                      | 112 (23%)     | 91 (31%)     | 96 (20%)     | 187 (23%)    | 0.004   |
| <b>Systemic Inflammation</b>       |               |              |              |              |         |
| WBC, 10/L                          | 7.1 [2.6]     | 7.8 [3.0]    | 7.5 [2.5]    | 7.9 [2.6]    | <0.001  |
| Neutrophils, %                     | 62.5 [11.8]   | 65.4 [11.3]  | 65.0 [11.0]  | 66.8 [11.1]  | <0.001  |
| hsCRP, mg/L                        | 2.5 [3.8]     | 4.0 [5.7]    | 2.7 [5.1]    | 4.0 [7.5]    | <0.001  |
| IL-6, pg/mL                        | 1.1 [1.5]     | 1.9 [3.1]    | 1.4 [2.0]    | 1.8 [2.7]    | <0.001  |
| IL-8, pg/mL                        | 6.7 [7.8]     | 9.6 [12.7]   | 6.4 [9.2]    | 7.4 [10.2]   | <0.001  |
| Fibrinogen, mg/dL                  | 420.8 [113.0] | 442.5        | 443.0        | 474.0        | <0.001  |
| TNF $\alpha$ , ng/mL               | 2.4 [33.7]    | 2.4 [20.0]   | 2.4 [3.7]    | 2.4 [2.5]    | <0.001  |
| CC-16, ng/mL                       | 4.9 [3.6]     | 5.3 [4.2]    | 5.1 [3.3]    | 4.9 [3.4]    | 0.337   |
| CCL-18, ng/mL                      | 100.4 [49.1]  | 113.1 [60.7] | 100.8 [48.6] | 110.5 [58.6] | <0.001  |
| SPD, ng/mL                         | 118.9 [82.6]  | 111.2 [87.0] | 121.2 [89.4] | 120.2 [87.1] | 0.381   |

LABA, long-acting  $\beta$ 2 agonist; ICS, Inhaled corticosteroids; WBC, white blood cells count; hsCRP, high sensitivity C-reactive protein, IL, interleukin; TNF $\alpha$ , tumor necrosis factor alpha; CC-16, clara cell 16 protein; CCL-18 Chemokine Ligand 18; SPD, surfactant protein D.

**Table 3E:** Mean (SD), median [IQR], or proportion of the main anthropometric, clinical, functional, radiological and systemic inflammatory variables, as well as outcomes at 3-years follow-up, of the three different C subgroups explored here (patients in C1 qualified because FEV<sub>1</sub><50% ref, patients in C2 qualified because they had more than 2 exacerbations in the previous year, and patients in C3 qualified based of both). For further explanations, see text. NS = non-significant

|                                       | <b>C subgroups</b> |             |             | <b>p values</b> |
|---------------------------------------|--------------------|-------------|-------------|-----------------|
|                                       | <b>C1</b>          | <b>C2</b>   | <b>C3</b>   | <b>Overall</b>  |
| N                                     | 336                | 62          | 85          |                 |
| Percent                               | 70                 | 13          | 18          |                 |
| <b>GOLD 2011 assessment variables</b> |                    |             |             |                 |
| mMRC dyspnoea score                   | 0.8 (0.4)          | 0.8 (0.4)   | 0.8 (0.4)   | NS              |
| FEV <sub>1</sub> % predicted post-    | 39.7 (7.6)         | 63.7 (8.7)  | 36.3 (8.5)  | <0.001          |
| ECOPD 12 months                       | 0.3 (0.5)          | 2.5 (1.0)   | 2.8 (1.5)   | <0.001          |
| <b>Demographics</b>                   |                    |             |             |                 |
| Age, years                            | 63.2 (7.2)         | 61.8 (7.7)  | 62.3 (6.9)  | NS              |
| Female, %                             | 28                 | 44          | 32          | NS              |
| BMI, kg/m <sup>2</sup>                | 25.1 (5.0)         | 25.9 (4.7)  | 25.2 (5.0)  | NS              |
| FFMI, kg/m <sup>2</sup>               | 16.7 (2.5)         | 17.1 (2.6)  | 16.6 (2.4)  | NS              |
| Smoking, pack-years                   | 45.3 (22.7)        | 46.1 (24.1) | 44.2 (24.6) | NS              |
| Current smoker, %                     | 43                 | 52          | 38          | NS              |
| <b>Symptoms</b>                       |                    |             |             |                 |
| Chronic Bronchitis, %                 | 38                 | 45          | 33          | NS              |
| SGRQ-C Total Score                    | 43.2 (17.0)        | 41.8 (14.9) | 51.9 (15.2) | <0.001          |
| CESD Total score                      | 9.2 (8.2)          | 10.1 (7.4)  | 10.0 (8.9)  | NS              |
| <b>Self-reported comorbidities</b>    |                    |             |             |                 |
| Hypertension, %                       | 35                 | 30          | 29          | NS              |
| Angina, %                             | 8                  | 8           | 10          | NS              |
| Heart attack, %                       | 5                  | 0           | 7           | NS              |
| Stroke, %                             | 3                  | 7           | 4           | NS              |
| Heart failure, %                      | 4                  | 2           | 6           | NS              |
| Arrhythmia, %                         | 10                 | 8           | 12          | NS              |
| Osteoporosis, %                       | 12                 | 16          | 16          | NS              |
| Osteoarthritis, %                     | 9                  | 22          | 17          | 0.009           |
| Rheumatoid arthritis, %               | 3                  | 4           | 5           | NS              |
| Inflammatory bowel                    | 3                  | 3           | 6           | NS              |
| Diabetes, %                           | 7                  | 0           | 6           | NS              |
| Peptic ulcer, %                       | 11                 | 16          | 6           | NS              |
| Reflux/heartburn, %                   | 20                 | 32          | 20          | NS              |
| Depression requiring                  | 14                 | 15          | 15          | NS              |
| Anxiety/panic attacks,                | 11                 | 14          | 13          | NS              |
| <b>Concomitant medications</b>        |                    |             |             |                 |
| LABA use, %                           | 68                 | 71          | 86          | 0.006           |

|                                            |              |              |              |        |
|--------------------------------------------|--------------|--------------|--------------|--------|
| Tiotropium use, %                          | 43           | 37           | 59           | 0.015  |
| ICS use, %                                 | 72           | 71           | 93           | <0.001 |
| Statin use, %                              | 21           | 19           | 18           | NS     |
| <b>Physiology</b>                          |              |              |              |        |
| FEV <sub>1</sub> % reversibility           | 10.1 (13.5)  | 8.7 (9.7)    | 12.1 (15.7)  | NS     |
| SaO <sub>2</sub> , %                       | 94.4 (3.0)   | 95.6 (2.2)   | 93.7 (4.4)   | <0.001 |
| 6MWD, m                                    | 405 (108)    | 446 (97)     | 394 (97)     | 0.029  |
| BODE Index                                 | 2.8 (1.0)    | 0.8 (0.8)    | 3.0 (1.0)    | <0.001 |
| <b>Imaging</b>                             |              |              |              |        |
| %LAA, -950HU                               | 19.9 (11.1)  | 10.7 (8.2)   | 21.3 (13.0)  | <0.001 |
| <b>Systemic inflammation</b>               |              |              |              |        |
| WBC, 10 <sup>9</sup> /l                    | 7.6 [2.5]    | 7.6 [2.3]    | 7.4 [2.6]    | NS     |
| Neutrophils, %                             | 65.5 [11.2]  | 62.1 [11.4]  | 66.3 [11.2]  | 0.002  |
| hsCRP, mg/l                                | 2.5 [4.2]    | 2.7 [5.7]    | 4.0 [5.9]    | 0.043  |
| IL-6, pg/ml                                | 1.4 [2.1]    | 1.2 [1.7]    | 1.4 [2.1]    | NS     |
| IL-8, pg/ml                                | 6.4 [9.5]    | 6.6 [9.3]    | 6.7 [8.6]    | NS     |
| Fibrinogen, mg/dl                          | 442.0        | 436.5        | 466.0        | NS     |
| TNFA, ng/ml                                | 2.4 [0.0]    | 2.4 [51.4]   | 2.4 [4.8]    | 0.005  |
| CC-16, ng/ml                               | 5.1 [3.0]    | 4.6 [3.5]    | 5.4 [4.2]    | NS     |
| CCL-18, ng/ml                              | 100.0 [48.8] | 103.1 [48.2] | 98.9 [49.6]  | NS     |
| SPD, ng/ml                                 | 118.4 [91.2] | 120.4 [58.9] | 133.1 [95.0] | NS     |
| <b>Outcomes during follow-up (3 years)</b> |              |              |              |        |
| Mortality rate, %                          | 29 (9)       | 0            | 12 (14)      | 0.01   |
| ECOPD, per year                            | 1.1 (1.2)    | 1.6 (1.2)    | 2.1 (1.8)    | <0.001 |
| Rate of FEV <sub>1</sub> decline,          | -28.0 (47.6) | -38.1 (44.3) | -33.5 (36.8) | NS     |

**Table 4E:** Mean (SD), median [IQR], or proportion of the main anthropometric, clinical, functional, radiological and systemic inflammatory variables, as well as outcomes at 3-years follow-up, of the three different D subgroups explored here (patients in D1 qualified because FEV1<50% ref, patients in D2 qualified because they had more than 2 exacerbations in the previous year, and patients in D3 qualified based of both). For further explanations, see text. NS = non-significant.

|                                       | <b>D subgroups</b> |             |             | <b>p values</b> |
|---------------------------------------|--------------------|-------------|-------------|-----------------|
|                                       | <b>D1</b>          | <b>D2</b>   | <b>D3</b>   | <b>Overall</b>  |
| N                                     | 522                | 72          | 236         |                 |
| Percent                               | 63                 | 9           | 28          |                 |
| <b>GOLD 2011 assessment variables</b> |                    |             |             |                 |
| mMRC dyspnoea                         | 2.5 (0.7)          | 2.5 (0.7)   | 2.7 (0.8)   | NS              |
| FEV <sub>1</sub> % predicted          | 35.1 (8.7)         | 60.2 (9.3)  | 35.1 (8.5)  | <0.001          |
| ECOPD 12 months                       | 0.4 (0.5)          | 2.8 (1.1)   | 2.9 (1.2)   | <0.001          |
| <b>Demographics</b>                   |                    |             |             |                 |
| Age, years                            | 63.7 (7.0)         | 63.5 (7.1)  | 63.5 (6.6)  | NS              |
| Female, %                             | 28                 | 57          | 39          | <0.001          |
| BMI, kg/m <sup>2</sup>                | 26.3 (6.0)         | 29.0 (7.3)  | 26.3 (5.7)  | 0.012           |
| FFMI, kg/m <sup>2</sup>               | 17.0 (2.8)         | 17.9 (3.3)  | 17.0 (2.9)  | NS              |
| Smoking, pack-                        | 51.5 (26.7)        | 50.3 (33.8) | 50.6 (27.9) | NS              |
| Current smoker, %                     | 32                 | 36          | 31          | NS              |
| <b>Symptoms</b>                       |                    |             |             |                 |
| Chronic bronchitis,                   | 37                 | 39          | 40          | NS              |
| SGRQ-C Total                          | 60.2 (15.8)        | 65.3 (15.3) | 65.5 (14.4) | <0.001          |
| CESD Total score                      | 12.5 (9.2)         | 15.3 (10.5) | 15.3 (10.0) | <0.001          |
| <b>Self-reported comorbidities</b>    |                    |             |             |                 |
| Hypertension, %                       | 41                 | 42          | 41          | NS              |
| Angina, %                             | 10                 | 16          | 14          | NS              |
| Heart attack, %                       | 9                  | 15          | 10          | NS              |
| Stroke, %                             | 3                  | 7           | 3           | NS              |
| Heart failure, %                      | 10                 | 8           | 7           | NS              |
| Arrhythmia, %                         | 12                 | 19          | 14          | NS              |
| Osteoporosis, %                       | 12                 | 17          | 23          | <0.001          |
| Osteoarthritis, %                     | 11                 | 36          | 16          | <0.001          |
| Rheumatoid                            | 2                  | 5           | 3           | NS              |
| Inflammatory                          | 5                  | 12          | 4           | 0.046           |
| Diabetes, %                           | 12                 | 15          | 9           | NS              |
| Peptic ulcer, %                       | 9                  | 11          | 12          | NS              |
| Reflux/heartburn,                     | 23                 | 49          | 30          | <0.001          |
| Depression                            | 16                 | 27          | 22          | 0.035           |
| Anxiety/panic                         | 19                 | 32          | 26          | 0.015           |
| <b>Concomitant medications</b>        |                    |             |             |                 |
| LABA use, %                           | 73                 | 81          | 88          | <0.001          |

|                                            |               |              |             |        |
|--------------------------------------------|---------------|--------------|-------------|--------|
| Tiotropium use, %                          | 52            | 60           | 57          | NS     |
| ICS use, %                                 | 81            | 88           | 92          | <0.001 |
| Statin use, %                              | 24            | 24           | 19          | NS     |
| <b>Physiology</b>                          |               |              |             |        |
| FEV <sub>1</sub> %                         | 10.3 (14.7)   | 9.6 (10.9)   | 10.4 (15.2) | NS     |
| SaO <sub>2</sub> , %                       | 93.6 (3.2)    | 95.1 (2.0)   | 93.7 (3.3)  | <0.001 |
| 6MWD, m                                    | 313 (117)     | 320 (92)     | 289 (111)   | 0.015  |
| BODE Index                                 | 5.1 (1.5)     | 3.3 (1.2)    | 5.5 (1.6)   | <0.001 |
| <b>Imaging</b>                             |               |              |             |        |
| %LAA, -950HU                               | 22.9 (13.2)   | 15.2 (9.8)   | 24.0 (11.9) | <0.001 |
| <b>Systemic inflammation</b>               |               |              |             |        |
| WBC, 10 <sup>9</sup> /l                    | 7.8 [2.6]     | 7.7 [2.7]    | 8.0 [2.6]   | NS     |
| Neutrophils, %                             | 66.9 [11.3]   | 65.1 [12.7]  | 67.0 [10.5] | NS     |
| hsCRP, mg/l                                | 3.7 [7.5]     | 3.9 [6.3]    | 4.5 [7.8]   | NS     |
| IL-6, pg/ml                                | 1.8 [2.7]     | 2.1 [2.4]    | 1.8 [2.9]   | NS     |
| IL-8, pg/ml                                | 7.0 [10.6]    | 8.8 [10.4]   | 7.5 [9.1]   | NS     |
| Fibrinogen, mg/dl                          | 470.0 [147.5] | 457.3        | 483.0       | 0.042  |
| TNFA, ng/ml                                | 2.4 [2.7]     | 2.4 [7.4]    | 2.4 [0.0]   | NS     |
| CC-16, ng/ml                               | 4.8 [3.4]     | 4.7 [3.4]    | 4.9 [3.4]   | NS     |
| CCL-18, ng/ml                              | 107.1 [59.0]  | 109.9        | 114.0       | NS     |
| SPD, ng/ml                                 | 121.3 [85.0]  | 122.8        | 115.8       | NS     |
| <b>Outcomes during follow-up (3 years)</b> |               |              |             |        |
| Mortality rate, %                          | 72 (14)       | 8 (11)       | 34 (14)     | NS     |
| ECOPD, per year                            | 1.2 (1.4)     | 2.1 (1.7)    | 2.6 (1.8)   | <0.001 |
| Rate of FEV <sub>1</sub>                   | -32.8         | -31.0 (42.6) | -30.1       | NS     |
